# Supplementary material for: Dual‐Directional Immunomodulatory Effects of Corbrin Capsule on Autoimmune Thyroid Diseases
Source: Hindawi journal article supplement (doi:10.1155/2016/1360386), 2016-01-01
Supplement: f1 [file 1360386.f1.pdf]

**Supplement Table Therapeutic effect of Cordyceps sinensis sacs in normal HT-Tx and hypothyroidism HT-Tx (24 weeks treatment )**

|                   | Euthyroidism HT-Tx |                  | P value | Hypothyroidism HT-Tx |                  | P value |
|-------------------|--------------------|------------------|---------|----------------------|------------------|---------|
|                   | Baseline           | End of treatment |         | Baseline             | End of treatment |         |
| FT3<br>(pmol/L)   | 4.24±0.47          | 3.99±0.64        | 0.179   | 3.74±1.04            | 4.39±1.33        | 0.222   |
| FT4<br>(pmol/L)   | 13.13±0.88         | 14.05±2.17       | 0.491   | 10.24±2.49           | 15.77±1.83       | <0.001  |
| TSH<br>(uIU/L)    | 3.39±0.37          | 3.08±0.77        | 0.307   | 18.01±7.77           | 3.63±1.49        | <0.001  |
| TPO-Ab<br>(IU/ml) | 905.7±592.3        | 592.55±156.65    | 0.011   | 813.14±482.15        | 511.87±292.44    | 0.052   |
| TG-Ab<br>(IU/ml)  | 262.7±162.5        | 239.23±128.22    | 0.767   | 832.91±483.8         | 312.56±144.56    | 0.043   |
| CD3+<br>(%)       | 73.27±6.7          | 68.63±4.9        | 0.072   | 65.86±8.96           | 63.62±8.20       | 0.390   |
| CD4+<br>(%)       | 38.04±7.69         | 35.35±4.17       | 0.331   | 33.6±5.11            | 35.34±5.28       | 0.271   |
| CD8+<br>(%)       | 31.27±7.64         | 27.00±4.03       | 0.079   | 26.86±6.06           | 23.84±7.93       | 0.032   |
| CD4/CD8<br>ratio  | 1.30±0.61          | 1.38±0.28        | 0.963   | 1.21±0.53            | 1.57±0.58        | 0.010   |

**Supplement Table** Among HT-Tx group, euthyroidism patients and hypothyroidism patients were compared. The decrease of TPO-Ab in euthyroidism HT-Tx group and the decrease of TG-Ab in hypothyroidism HT-Tx group were more obvious, respectively. As for the CD4/CD8 ratio, hypothyroidism HT-Tx restored nearer to the median of normal ranges other than euthyroidism HT.
